# Supplementary material for: Efficient photocatalytic water oxidation catalyzed by polyoxometalate [Fe11(H2O)14(OH)2(W3O10)2(α-SbW9O33)6]27− based on abundant metals
Source: Royal Society of Chemistry journal article supplement (doi:10.1039/c5cc04551g), 2015-01-01
Supplement: c5cc04551g1.pdf [file c5cc04551g1.pdf]

## Supporting Information

### **Efficient photocatalytic water oxidation catalyzed by polyoxometalate of $[\text{Fe}_{11}(\text{H}_2\text{O})_{14}(\text{OH})_2(\text{W}_3\text{O}_{10})_2(\alpha\text{-SbW}_9\text{O}_{33})_6]^{27-}$ based on abundant metals**

Xiaoqiang Du<sup>a</sup>, Yong Ding <sup>ab\*</sup>, Fangyuan Song <sup>a</sup>, Baochun Ma<sup>a</sup>, Junwei Zhao <sup>c</sup>, Jie Song <sup>d</sup>

<sup>a</sup> *State Key Laboratory of Applied Organic Chemistry, Key Laboratory of Nonferrous Metals Chemistry and Resources Utilization of Gansu Province, and College of Chemistry and Chemical Engineering, Lanzhou University, Lanzhou 730000, China*

<sup>b</sup> *State Key Laboratory for Oxo Synthesis and Selective Oxidation, Lanzhou Institute of Chemical Physics, Chinese Academy of Sciences, Lanzhou 730000, China*

<sup>c</sup> *Henan Key Laboratory of Polyoxometalate Chemistry, College of Chemistry and Chemical Engineering, Henan University, Kaifeng, Henan 475004 (P.R. China)*

<sup>d</sup> *Department of Biomedical Engineering, Emory University and Georgia Institute of Technology, Atlanta, Georgia 30322, USA*

\* To whom correspondence should be addressed.

E-mail addresses: dingyongl@lzu.edu.cn

## Quantum Yield Calculation

Initial O<sub>2</sub> formation rate = 0.13 μmol·s<sup>-1</sup>

Irradiation radius = 1 cm = 0.01 m

Photon flux =  $\pi \times (0.01\text{m})^2 \times 1748 \mu\text{mol}\cdot\text{m}^{-2}\cdot\text{s}^{-1} = 0.549 \mu\text{mol}\cdot\text{s}^{-1}$

$$\begin{aligned}\Phi_{\text{QY(initial)}} &= 2 \times \frac{\text{initial O}_2 \text{ formation rate}}{\text{photon flux}} \times 100\% \\ &= \frac{2 \times 0.13 \mu\text{mol}\cdot\text{s}^{-1}}{0.549 \mu\text{mol}\cdot\text{s}^{-1}} \times 100\% \\ &= 47\%\end{aligned}$$

## Electrochemistry

H<sub>2</sub>SO<sub>4</sub>, Na<sub>2</sub>SO<sub>4</sub>, NaOH, H<sub>3</sub>BO<sub>3</sub>, Na<sub>2</sub>B<sub>4</sub>O<sub>7</sub> were commercial products. The pH = 3 medium was made up with 0.2 M Na<sub>2</sub>SO<sub>4</sub> + H<sub>2</sub>SO<sub>4</sub>. The solutions were deaerated thoroughly for a least 30 min with pure argon and kept under a positive pressure of this gas during the experiments.

## Equipment and Apparatus

Cyclic voltammetry (CV) was recorded on a CHI660D electrochemical analyzer, where a glassy carbon, an Ag/AgCl and a Pt wire electrodes were used as a working, reference and auxiliary electrodes, respectively. CV was obtained in buffer solutions containing 0.2 M NaNO<sub>3</sub> as a supporting electrolyte at room temperature with a scanning rate of 25 mV s<sup>-1</sup>. UV-vis absorption spectra were recorded on Beijing Purkinje General Instrument Co.,Ltd. TU-1810 spectrophotometer equipped with a photomultiplier tube detector. Infrared spectra (2–4% (w/w) sample in KBr pellets) were performed using a Bruker VERTEX 70v FT-IR spectrometer. Elemental analysis of the catalysts was performed on TJA ICP-atomic emission spectrometer (IRIS Advantage ER/S). X-ray photoelectron spectra (XPS) were measured by ESCALAB250xi with X-Ray monochromatisation. GC-MS spectral analyses of isotopic labelled O<sub>2</sub> were performed on an Agilent Series 7890A model chromatograph interfaced with an Agilent Series 5975C model mass spectrometer. The capillary electrophoretic were performed on Beckman, MDQ. equipped with a 32.karat 7.0 software. Transmission electron microscope (TEM) images were obtained with a JEOL JEM-2010 instrument operated at 200 kV.

### Isotope-Labeled Experiment

The 10.8 atom %  $\text{H}_2^{18}\text{O}$  of borate buffer solution (pH 10.0, 80 mM) containing **1** (1.3  $\mu\text{M}$ ),  $[\text{Ru}(\text{bpy})_3](\text{ClO}_4)_2$  (1 mM),  $\text{Na}_2\text{S}_2\text{O}_8$  (5 mM) was deaerated with Helium gas before irradiation by LED light ( $\lambda \geq 420$  nm) in a flask that is sealed with a rubber septum. After 9 min, 50  $\mu\text{L}$  of gas sample was withdrawn using a gas-tight syringe for gas analysis. An Agilent Series 7890A model chromatograph interfaced with an Agilent Series 5975C model mass spectrometer operating in electron impact ionization mode was used to collect mass spectrometric data. The MS detector was tuned for maximum sensitivity (quadrupole temperature, 150  $^\circ\text{C}$ ; Ion source temperature, 230  $^\circ\text{C}$ ). Single ion mode was used to scan for the ions  $m/z = 28, 32, 34, 36$  with a dwell time of 100 ms, resulting in 8.3 cycles per second. The ions of  $m/z$  range from 30 to 50 were also scanned in order to observe the abundance change of  $^{16}\text{O}^{18}\text{O}$  and  $^{18}\text{O}^{18}\text{O}$ , which evolved from  $\text{H}_2^{16}\text{O}$  and  $\text{H}_2^{18}\text{O}$ , respectively. The total flow rate into the spectrometer was limited to 0.6 mL/min. The GC equipped with a molecular sieve column (30 m  $\times$  0.32 mm  $\times$  15  $\mu\text{m}$ ), and the vaporizing chamber temperature and column temperature was set for 100  $^\circ\text{C}$  and 35  $^\circ\text{C}$ , respectively.

### The preparing of $\text{Na}_{27}[\text{Fe}_{11}(\text{H}_2\text{O})_{14}(\text{OH})_2(\text{W}_3\text{O}_{10})_2(\alpha\text{-SbW}_9\text{O}_{33})_6] \cdot 103\text{H}_2\text{O}$ (**1**), $\alpha\text{-Fe}_2\text{O}_3$ nanoparticles, $\text{Na}_6[\text{Fe}_4(\text{H}_2\text{O})_{10}(\text{SbW}_9\text{O}_{33})_2] \cdot 40\text{H}_2\text{O}$ and $\text{K}_5\text{SiFe}(\text{OH})_2\text{W}_{11}\text{O}_{39} \cdot 14\text{H}_2\text{O}$

$\text{Na}_{27}[\text{Fe}_{11}(\text{H}_2\text{O})_{14}(\text{OH})_2(\text{W}_3\text{O}_{10})_2(\alpha\text{-SbW}_9\text{O}_{33})_6] \cdot 103\text{H}_2\text{O}$  were prepared according to a published method<sup>1</sup> and all the characterizations of **1** were reported in published literature<sup>1</sup>.  $\alpha\text{-Fe}_2\text{O}_3$  nanoparticles with size of 60 nm, (Figure S13) were prepared according to a published method<sup>2</sup>.  $\text{Na}_6[\text{Fe}_4(\text{H}_2\text{O})_{10}(\text{SbW}_9\text{O}_{33})_2] \cdot 40\text{H}_2\text{O}$  were prepared according to a published method<sup>3</sup> and  $\text{K}_5\text{SiFe}(\text{OH})_2\text{W}_{11}\text{O}_{39} \cdot 14\text{H}_2\text{O}$  were prepared according to a published method.<sup>4</sup>

### The measurement of Quantum Yield

The quantum yields of  $\text{O}_2$  evolution were determined for the photocatalytic water oxidation under the following conditions. A quartz flask containing a borate buffer solution (80 mM, pH 10.0, 16 mL) with **1** (1.3  $\mu\text{M}$ ),  $[\text{Ru}(\text{bpy})_3](\text{ClO}_4)_2$  (1 mM) and  $\text{Na}_2\text{S}_2\text{O}_8$  (5 mM) was irradiated by an interference filtered (Asahi spectra SV 490) from a LED source ( $420 < \lambda < 490$  nm) described above. The photon flux of the incident light was determined using a Ray virtual radiation

actinometer (FU 100, silicon ray detector, light spectrum, 400-700 nm; sensitivity, 10-50  $\mu\text{V}$   $\mu\text{mol}^{-1} \text{m}^{-2} \text{s}^{-1}$ ), affording a value to be 1748  $\mu\text{mol m}^{-2} \text{s}^{-1}$ .

### **Laser flash photolysis**

Nanosecond transient absorption measurements were performed on an Edinburgh Instruments LP920-KS laser flash photolysis spectrometer, using an OPO laser source (OPOTEK Vibrant). Transient detection was obtained using a photomultiplier-oscilloscope combination (Hamamatsu R928P, Tektronix TDS3012C). Kinetics of bleach recovery conditions: Excitation wavelength = 445 nm, analysis wavelength = 450 nm; 50  $\mu\text{M}$   $[\text{Ru}(\text{bpy})_3]^{2+}$ ; 5 mM  $\text{Na}_2\text{S}_2\text{O}_8$ ; 0-100  $\mu\text{M}$  **1**; pH 10.0, 80 mM borate buffer.

### **Photocatalytic Water Oxidation**

Photocatalytic water oxidation was performed as follows. The desired concentration of catalyst (0.33–2.60  $\mu\text{M}$ ) was added to a buffer solution (80 mM, pH 8.0–11.0 for borate buffer) containing  $[\text{Ru}(\text{bpy})_3](\text{ClO}_4)_2$  (1.0 mM) and  $\text{Na}_2\text{S}_2\text{O}_8$  (5.0 mM). The above solution was deaerated by purging with Ar gas for 5 min in a flask (21 mL) sealed with a rubber septum (the volume of reaction solution was 16 mL). The reaction was then started by irradiating the solution with a LED light source (light intensity 16 mW, beam diameter 2 cm) through a transmitting glass filter ( $\lambda \geq 420$  nm) at room temperature. After each irradiation time, 150  $\mu\text{L}$  of Ar was injected into the flask and then the same volume of gas in the headspace of the flask was withdrawn by a SGE gas-tight syringe and analysed by gas chromatography (GC). The  $\text{O}_2$  in the sampled gas was separated by passing through a 2 m  $\times$  3 mm packed molecular sieve 5A column with an Ar carrier gas and quantified by a thermal conductivity detector (TCD) (Shimadzu GC-9A). The total amount of evolved  $\text{O}_2$  was calculated from the concentration of  $\text{O}_2$  in the headspace gas. Contamination of the head-space with air was corrected by measuring of  $\text{N}_2$  present in the head-space (from the  $\text{N}_2$  peak in the GC traces). The solution pH was measured after the reaction by a METTLER TOLEDO FEP20 pH meter.

**Table S1. The BVS Values of Fe and Selected the Oxygen Atoms in 1**

| Atoms | BVS values | Atoms | BVS values | Atoms | BVS values |
|-------|------------|-------|------------|-------|------------|
| Fe1   | 3.23       | Fe2   | 3.16       | Fe3   | 3.20       |
| Fe4   | 2.93       | Fe5   | 3.00       | Fe6   | 2.98       |
| O1W   | 0.42       | O3W   | 0.41       | O109  | 1.99       |
| O2W   | 0.34       | O4W   | 0.42       | O110  | 1.99       |
| O5W   | 0.45       | O6W   | 0.38       | O7W   | 0.34       |

**Table S2. Crystal Data and Structure Refinements for Na<sub>6</sub>[Fe<sub>4</sub>(H<sub>2</sub>O)<sub>10</sub>(SbW<sub>9</sub>O<sub>33</sub>)<sub>2</sub>] · 40H<sub>2</sub>O**

|                                            |                                                                                                                                           |
|--------------------------------------------|-------------------------------------------------------------------------------------------------------------------------------------------|
| Identification code                        | Na <sub>6</sub> [Fe <sub>4</sub> (H <sub>2</sub> O) <sub>10</sub> (SbW <sub>9</sub> O <sub>33</sub> ) <sub>2</sub> ] · 40H <sub>2</sub> O |
| Empirical formula                          | H <sub>100</sub> Fe <sub>4</sub> Na <sub>6</sub> O <sub>116</sub> Sb <sub>2</sub> W <sub>18</sub>                                         |
| Formula weight                             | 5752                                                                                                                                      |
| Temperature/K                              | 293(2)                                                                                                                                    |
| Crystal system                             | monoclinic                                                                                                                                |
| Space group                                | P2 <sub>1</sub> /c                                                                                                                        |
| a/Å                                        | 16.1262(8)                                                                                                                                |
| b/Å                                        | 15.2572(5)                                                                                                                                |
| c/Å                                        | 20.2165(13)                                                                                                                               |
| α/°                                        | 90.00                                                                                                                                     |
| β/°                                        | 96.061(7)                                                                                                                                 |
| γ/°                                        | 90.00                                                                                                                                     |
| Volume/Å <sup>3</sup>                      | 4946.3(4)                                                                                                                                 |
| Z                                          | 2                                                                                                                                         |
| ρ <sub>calc</sub> /mg/mm <sup>3</sup>      | 3.908                                                                                                                                     |
| m/mm <sup>-1</sup>                         | 47.815                                                                                                                                    |
| F(000)                                     | 5164.0                                                                                                                                    |
| Radiation                                  | Cu Kα (λ = 1.54184)                                                                                                                       |
| 2θ range for data collection               | 8 to 145.32°                                                                                                                              |
| Index ranges                               | -19 ≤ h ≤ 19, -18 ≤ k ≤ 18, -21 ≤ l ≤ 25                                                                                                  |
| Reflections collected                      | 33341                                                                                                                                     |
| Independent reflections                    | 9794 [R <sub>int</sub> = 0.0370]                                                                                                          |
| Data/restraints/parameters                 | 9794/12/658                                                                                                                               |
| Goodness-of-fit on F <sup>2</sup>          | 1.042                                                                                                                                     |
| Final R indexes [I ≥ 2σ (I)]               | R <sub>1</sub> <sup>a</sup> = 0.0250, wR <sub>2</sub> <sup>b</sup> = 0.0534                                                               |
| Final R indexes [all data]                 | R <sub>1</sub> <sup>a</sup> = 0.0320, wR <sub>2</sub> <sup>b</sup> = 0.0562                                                               |
| Largest diff. peak/hole / eÅ <sup>-3</sup> | 1.85/-1.15                                                                                                                                |

$$^a R_1 = \Sigma ||F_0| - |F_c|| / \Sigma |F_0|; ^b wR_2 = \Sigma [w(F_0^2 - F_c^2)^2] / \Sigma [w(F_0^2)^2]^{1/2}$$

**Table S3. Water Oxidation Catalyzed without 1 or Ru(bpy)<sub>3</sub>Cl<sub>2</sub> or Persulfate**

| Entry | [Ru(bpy) <sub>3</sub> ]Cl <sub>2</sub><br>(mM) | Na <sub>2</sub> S <sub>2</sub> O <sub>8</sub><br>(mM) | Catalyst<br>(μM) | O <sub>2</sub> (μmol) |
|-------|------------------------------------------------|-------------------------------------------------------|------------------|-----------------------|
| 1     | 1                                              | 5                                                     | 0                | 1.9                   |
| 2     | 1                                              | 0                                                     | 1.3              | 0                     |
| 3     | 0                                              | 5                                                     | 1.3              | 0                     |

Conditions: LED lamp ( $\lambda \geq 420$  nm), 80 mM sodium borate buffer (initial pH 10.0), total reaction volume is 16 mL and overall volume is ~21 mL, vigorous agitation using a magnetic stirrer.

**Table S4. Water Oxidation Catalyzed without 1 or Ru(bpy)<sub>3</sub>(ClO<sub>4</sub>)<sub>2</sub> or Persulfate**

| Entry | [Ru(bpy) <sub>3</sub> ](ClO <sub>4</sub> ) <sub>2</sub><br>(mM) | Na <sub>2</sub> S <sub>2</sub> O <sub>8</sub><br>(mM) | Catalyst<br>(μM) | O <sub>2</sub> (μmol) |
|-------|-----------------------------------------------------------------|-------------------------------------------------------|------------------|-----------------------|
| 1     | 1                                                               | 5                                                     | 0                | 3.9                   |
| 2     | 1                                                               | 0                                                     | 1.3              | 0                     |
| 3     | 0                                                               | 5                                                     | 1.3              | 0                     |

Conditions: LED lamp ( $\lambda \geq 420$  nm), 80 mM sodium borate buffer (initial pH 10.0), total reaction volume is 16 mL and overall volume is ~21 mL, vigorous agitation using a magnetic stirrer.

**Table S5. Water Oxidation Catalyzed without **1** under Different pH**

| Entry | pH (80 mM NaBi ) | O <sub>2</sub> (μmol) |
|-------|------------------|-----------------------|
| 1     | 8.0              | 0.2                   |
| 2     | 9.0              | 3.1                   |
| 3     | 10.0             | 3.9                   |
| 4     | 11.0             | 4.3                   |

Conditions: LED lamp ( $\lambda \geq 420$  nm), 0 μM **1**, 1.0 mM [Ru(bpy)<sub>3</sub>](ClO<sub>4</sub>)<sub>2</sub>, 5.0 mM Na<sub>2</sub>S<sub>2</sub>O<sub>8</sub>, total reaction volume is 16 mL and overall volume is ~21mL, vigorous agitation using a magnetic stirrer.

**Table S6. Water Oxidation Catalyzed by Fe<sub>11</sub> POM under Different pH <sup>a</sup>**

| Entry          | pH  | O <sub>2</sub> (μmol) | O <sub>2</sub> yield(%) | TON  | TOF(s <sup>-1</sup> ) | [Ru(bpy) <sub>3</sub> ](ClO <sub>4</sub> ) <sub>2</sub> Degradation Percentage (%) |
|----------------|-----|-----------------------|-------------------------|------|-----------------------|------------------------------------------------------------------------------------|
| 1 <sup>b</sup> | 5.8 | 0                     | 0                       | 0    | 0                     | Not studied                                                                        |
| 2 <sup>c</sup> | 8   | 3.4                   | 8.6                     | 164  | 0.9                   | 51.5                                                                               |
| 3 <sup>c</sup> | 9   | 15.9                  | 40                      | 762  | 4.0                   | 13.9                                                                               |
| 4 <sup>c</sup> | 10  | 37.8                  | 94                      | 1815 | 6.3                   | 3.4                                                                                |
| 5 <sup>c</sup> | 11  | 26.8                  | 67                      | 1290 | 5.0                   | 6.3                                                                                |

<sup>a</sup> Conditions: LED lamp ( $\lambda \geq 420$  nm), 1.3 μM Fe<sub>11</sub> POM, 1.0 mM [Ru(bpy)<sub>3</sub>](ClO<sub>4</sub>)<sub>2</sub>, 5.0 mM Na<sub>2</sub>S<sub>2</sub>O<sub>8</sub>, total reaction volume is 16 mL and overall volume is ~21mL, vigorous agitation using a magnetic stirrer. Dye degradation was evaluated by using UV-vis spectroscopy (Figure S 18 -23).

<sup>b</sup> 20 mM Na<sub>2</sub>SiF<sub>6</sub> buffer

<sup>c</sup> 80mM borate buffer,



**Table S7. TON, TOF<sub>initial</sub> and Quantum Yield of Photocatalytic Water Oxidation Catalyzed by Different Catalysts**

| Catalyst                                                                                                                                               | Representative reaction conditions                                                                                                                                                                                       | TON                                      | TOF                                                 | $\Phi_{QY(initial)}$<br>% | Ref.      |
|--------------------------------------------------------------------------------------------------------------------------------------------------------|--------------------------------------------------------------------------------------------------------------------------------------------------------------------------------------------------------------------------|------------------------------------------|-----------------------------------------------------|---------------------------|-----------|
| <b>1</b>                                                                                                                                               | LED lamp ( $\lambda \geq 420$ nm), 1.3 $\mu$ M catalyst, 1.0 mM [Ru(bpy) <sub>3</sub> ](ClO <sub>4</sub> ) <sub>2</sub> , 5.0 mM Na <sub>2</sub> S <sub>2</sub> O <sub>8</sub> , 80 mM sodium borate buffer (pH 10.0)    | 1815                                     | 6.3 s <sup>-1</sup>                                 | 47                        | This work |
| Na <sub>10</sub> [Co <sub>4</sub> (H <sub>2</sub> O) <sub>2</sub> ( $\alpha$ -PW <sub>9</sub> O <sub>34</sub> ) <sub>2</sub> ]                         | Xe lamp (420–470 nm), 5 $\mu$ M catalyst, 1.0 mM [Ru(bpy) <sub>3</sub> ]Cl <sub>2</sub> , 5.0 mM Na <sub>2</sub> S <sub>2</sub> O <sub>8</sub> , 80 mM sodium borate buffer (pH 8.0)                                     | 224                                      | No data                                             | 30                        | 5         |
| K <sub>10.2</sub> Na <sub>0.8</sub> [{Co <sub>4</sub> ( $\mu$ -OH)(H <sub>2</sub> O) <sub>3</sub> }(Si <sub>2</sub> W <sub>19</sub> O <sub>70</sub> )] | Xe lamp (420–520 nm), 10 $\mu$ M catalyst, 1.0 mM [Ru(bpy) <sub>3</sub> ]Cl <sub>2</sub> , 5 mM Na <sub>2</sub> S <sub>2</sub> O <sub>8</sub> , 25 mM sodium borate buffer (pH 9.0)                                      | 80                                       | 0.1 s <sup>-1</sup>                                 | No data                   | 6         |
| (NH <sub>4</sub> ) <sub>3</sub> [CoMo <sub>6</sub> O <sub>24</sub> H <sub>6</sub> ]                                                                    | 300 W Xe lamp (400–800 nm), 0.4 mM [Ru(bpy) <sub>3</sub> ](NO <sub>3</sub> ) <sub>2</sub> , 3 mM Na <sub>2</sub> S <sub>2</sub> O <sub>8</sub> , 0.1 M borate buffer solution (pH 8.0)                                   | 107 (Based on 3.6 $\mu$ M catalyst)      | 0.11 s <sup>-1</sup> (Based on 20 $\mu$ M catalyst) | 54                        | 7         |
| (NH <sub>4</sub> ) <sub>6</sub> [Co <sub>2</sub> Mo <sub>10</sub> O <sub>38</sub> H <sub>4</sub> ]                                                     | 300 W Xe lamp (400–800 nm), 0.4 mM [Ru(bpy) <sub>3</sub> ](NO <sub>3</sub> ) <sub>2</sub> , 3 mM Na <sub>2</sub> S <sub>2</sub> O <sub>8</sub> , 0.1 M borate buffer solution (pH 8.0)                                   | 154 (Based on 1.9 $\mu$ M catalyst)      | 0.16 s <sup>-1</sup> (Based on 10 $\mu$ M catalyst) | 42                        | 7         |
| <i>Trans</i> -[Co <sup>II</sup> (qpy)(OH) <sub>2</sub> ](ClO <sub>4</sub> ) <sub>2</sub>                                                               | 500 W mercury arc lamp (457 nm), 0.2 $\mu$ M catalyst, 128 $\mu$ M [Ru(bpy) <sub>3</sub> ]Cl <sub>2</sub> , 5 mM Na <sub>2</sub> S <sub>2</sub> O <sub>8</sub> , 15 mM borate buffer solution (pH 8.0)                   | 355 (Reaction time = 1.5 h)              | No data                                             | No data                   | 8         |
| [Co <sup>II</sup> (Me <sub>6</sub> tren)(OH <sub>2</sub> )](ClO <sub>4</sub> ) <sub>2</sub>                                                            | 500 W Xe lamp ( $\lambda > 420$ nm), 5.0 $\mu$ M catalyst, 0.5 mM [Ru(bpy) <sub>3</sub> ](ClO <sub>4</sub> ) <sub>2</sub> , 10 mM Na <sub>2</sub> S <sub>2</sub> O <sub>8</sub> , 100 mM borate buffer solution (pH 9.0) | 420 (Decomposed to Co(OH) <sub>x</sub> ) | No data                                             | 32                        | 9         |
| [Co <sup>III</sup> (Cp*)(bpy)(OH <sub>2</sub> )](PF <sub>6</sub> ) <sub>2</sub>                                                                        | 500 W Xe lamp ( $\lambda > 420$ nm), 5.0 $\mu$ M catalyst, 0.5 mM [Ru(bpy) <sub>3</sub> ](ClO <sub>4</sub> ) <sub>2</sub> , 10 mM Na <sub>2</sub> S <sub>2</sub> O <sub>8</sub> , 100 mM borate buffer solution (pH 9.0) | 320 (Decomposed to Co(OH) <sub>x</sub> ) | No data                                             | 30                        | 9         |
| Co <sup>III</sup> <sub>4</sub> O <sub>4</sub> (OAc) <sub>4</sub> (py) <sub>4</sub>                                                                     | 250W high power Arc lamp (450 nm), 41.5 $\mu$ M catalyst, 0.5 mM [Ru(bpy) <sub>3</sub> ]Cl <sub>2</sub> , 10.5 mM Na <sub>2</sub> S <sub>2</sub> O <sub>8</sub> , HCO <sub>3</sub> <sup>-</sup> buffer (pH 7.0)          | 40                                       | 0.02 s <sup>-1</sup>                                | No data                   | 10        |

|                                                     |                                                                                                                                                              |                                  |                                            |         |    |
|-----------------------------------------------------|--------------------------------------------------------------------------------------------------------------------------------------------------------------|----------------------------------|--------------------------------------------|---------|----|
| $K_{10}H_2[Ni_5(OH)_6(OH)_3(Si_2W_{18}O_{66})_2]$   | 17 mW LED light (455 nm), 1.0 mM $[Ru(bpy)_3]Cl_2$ , 5.0 mM $Na_2S_2O_8$ , 80 mM sodium borate buffer (pH 8.0)                                               | 60 (Based on $2\mu M$ catalyst)  | $1 s^{-1}$ (the first 10 Seconds)          | 3.8     | 11 |
| $Cs_9[(\gamma-PW_{10}O_{36})_2Ru_4O_5(OH)(H_2O)_4]$ | Xe lamp (420–520 nm), $5.1\mu M$ catalyst, 1.0 mM $[Ru(bpy)_3]Cl_2$ , 5 mM $Na_2S_2O_8$ , 20 mM $Na_2SiF_6$ buffer (pH 5.8)                                  | 120                              | $0.13 s^{-1}$                              | No data | 12 |
| $\alpha-K_6Na[\{Ru_3O_3(H_2O)Cl_2\}(SiW_9O_{34})]$  | LED lamp (470 nm), $50\mu M$ catalyst, 1 mM $[Ru(bpy)_3]Cl_2$ , 5 mM $Na_2S_2O_8$ , 20 mM $Na_2SiF_6$ buffer (pH 5.8)                                        | 23                               | $0.7 s^{-1}$                               | No data | 13 |
| $\alpha-K_{11}Na_1[Co_4(H_2O)_2(SiW_9O_{34})_2]$    | LED lamp (470 nm) 1 mM $[Ru(bpy)_3]Cl_2$ , 5 mM $Na_2S_2O_8$ , 20 mM $Na_2SiF_6$ buffer (pH 5.8)                                                             | 24 (Based on $20\mu M$ catalyst) | $0.4 s^{-1}$ (Based on $42\mu M$ catalyst) | No data | 13 |
| $Ru^{II}(hqc)(pic)_3$                               | A 500 W xenon lamp ( $\lambda > 400 nm$ ), $55.0\mu M$ catalyst, $550\mu M [Ru-(bpy)_3]^{2+}$ , 10 mM $S_2O_8^{2-}$ , 20 mM phosphate buffer (pH 7.2)        | $< 5$                            | No data                                    | No data | 14 |
|                                                     | A 500 W xenon lamp ( $\lambda > 400 nm$ ), $55.0\mu M$ catalyst, $550\mu M [Ru-(bpy)_2(dcbpy)]^{2+}$ , 10 mM $S_2O_8^{2-}$ , 20 mM phosphate buffer (pH 7.2) | 42                               | No data                                    | No data | 14 |
|                                                     | A 500 W xenon lamp ( $\lambda > 400 nm$ ), $55.0\mu M$ catalyst, $550\mu M [Ru-(bpy)_2(dcbpy)]^{2+}$ , 10 mM $S_2O_8^{2-}$ , 20 mM phosphate buffer (pH 7.2) | 61                               | No data                                    | 9       | 14 |
| $Fe(mcp)Cl_2$                                       | A 200 W Xe lamp ( $\lambda > 420 nm$ ), 1.0 mM Catalyst, 0.2 mM $[Ru(bpy)_3]Cl_2$ , 2 mM $Na_2S_2O_8$ , 15 mM borate buffer (pH 8.5) at $23^\circ C$         | 194                              | No data                                    | No data | 15 |
| $[Fe(bpy)_2Cl_2]Cl$                                 | A 200 W Xe lamp ( $\lambda > 420 nm$ ), 1.0 mM Catalyst, 0.2 mM $[Ru(bpy)_3]Cl_2$ , 2 mM $Na_2S_2O_8$ , 15 mM borate buffer (pH 8.5) at $23^\circ C$         | 157                              | No data                                    | No data | 15 |
| $[Fe(tpy)_2]Cl_2$                                   | A 200 W Xe lamp ( $\lambda > 420 nm$ ), 1.0 mM Catalyst, 0.2 mM $[Ru(bpy)_3]Cl_2$ , 2 mM $Na_2S_2O_8$ , 15 mM borate buffer (pH 8.5) at $23^\circ C$         | 376                              | No data                                    | No data | 15 |
| $[Fe(cyclen)Cl_2]Cl$                                | A 200 W Xe lamp ( $\lambda > 420 nm$ ), 1.0 mM                                                                                                               | 412                              | No data                                    | No data | 15 |

|                                                                                                                                           |                                                                                                                                                                                                                  |         |                      |         |    |
|-------------------------------------------------------------------------------------------------------------------------------------------|------------------------------------------------------------------------------------------------------------------------------------------------------------------------------------------------------------------|---------|----------------------|---------|----|
| 1                                                                                                                                         | Catalyst, 0.2 mM [Ru(bpy) <sub>3</sub> ]Cl <sub>2</sub> , 2mM Na <sub>2</sub> S <sub>2</sub> O <sub>8</sub> , 15 mM borate buffer (pH 8.5) at 23 °C                                                              |         |                      |         |    |
| Fe(tmc)Br <sub>2</sub>                                                                                                                    | A 200 W Xe lamp ( $\lambda > 420$ nm), 1.0 mM Catalyst, 0.2 mM [Ru(bpy) <sub>3</sub> ]Cl <sub>2</sub> , 2mM Na <sub>2</sub> S <sub>2</sub> O <sub>8</sub> , 15 mM borate buffer (pH 8.5) at 23 °C                | 364     | No data              | No data | 15 |
| Fe(ClO <sub>4</sub> ) <sub>3</sub>                                                                                                        | A 200 W Xe lamp ( $\lambda > 420$ nm), 1.0 mM Catalyst, 0.2 mM [Ru(bpy) <sub>3</sub> ]Cl <sub>2</sub> , 2mM Na <sub>2</sub> S <sub>2</sub> O <sub>8</sub> , 15 mM borate buffer (pH 8.5) at 23 °C                | 436     | No data              | No data | 15 |
| Fe(BQEN)(OTf)<br>2                                                                                                                        | A 500 W xenon lamp ( $\lambda > 400$ nm ), 5.0 $\mu$ M catalyst, 0.25 mM [Ru(bpy) <sub>3</sub> ]SO <sub>4</sub> , 5.0 mM Na <sub>2</sub> S <sub>2</sub> O <sub>8</sub> , 100 mM sodium borate buffer (pH 9.0)    | 259     | No data              | No data | 16 |
| Fe(BQCN)(OTf)<br>2                                                                                                                        | A 500 W xenon lamp ( $\lambda > 400$ nm ), 5.0 $\mu$ M catalyst, 0.25 mM [Ru(bpy) <sub>3</sub> ]SO <sub>4</sub> , 5.0 mM Na <sub>2</sub> S <sub>2</sub> O <sub>8</sub> , 100 mM sodium borate buffer (pH 9.0)    | No data | No data              | No data | 16 |
| [Co <sup>II</sup><br>4(hmp) <sub>4</sub> ( $\mu$ -<br>OAc) <sub>2</sub> ( $\mu$ -<br>OAc) <sub>2</sub> (H <sub>2</sub> O) <sub>2</sub> ]  | LED lamp ( $\lambda = 470$ nm), 60 $\mu$ M catalyst, 1 mM [Ru(bpy) <sub>3</sub> ] <sup>2+</sup> , 5 mM Na <sub>2</sub> S <sub>2</sub> O <sub>8</sub> , , 50 mM borate (pH 9.0)                                   | 28      | 7 s <sup>-1</sup>    | No data | 17 |
| [{Co(H <sub>2</sub> O) <sub>3</sub> } <sub>2</sub> {CoBi <sub>2</sub> W <sub>19</sub> O <sub>66</sub> (OH) <sub>4</sub> }] <sup>10-</sup> | LED lamp (470 nm), 115 $\mu$ M catalyst, 1 mM [Ru(bpy) <sub>3</sub> ]Cl <sub>2</sub> , 5 mM Na <sub>2</sub> S <sub>2</sub> O <sub>8</sub> , 20 mM Na <sub>2</sub> SiF <sub>6</sub> buffer (pH 5.8)               | 21      | No data              | No data | 18 |
| [NiL <sub>3</sub> ](ClO <sub>4</sub> ) <sub>2</sub>                                                                                       | 500 W Xe lamp ( $\lambda=457$ nm), 0.6 mM catalyst, 0.12 mM [Ru(bpy) <sub>3</sub> ](ClO <sub>4</sub> ) <sub>2</sub> , 2.5 mM Na <sub>2</sub> S <sub>2</sub> O <sub>8</sub> , 30mM borate buffer (pH 8.0), T=23°C | 855     | No data              | No data | 19 |
| [{Co <sub>4</sub> (OH) <sub>3</sub> (PO <sub>4</sub> ) <sub>4</sub> (SiW <sub>9</sub> O <sub>34</sub> ) <sub>4</sub> }] <sup>32-</sup>    | A 300 W xenon lamp ( $\lambda > 420$ nm ), 20 $\mu$ M catalyst, 1.0 mM [Ru(bpy) <sub>3</sub> ]Cl <sub>2</sub> , 5.0 mM Na <sub>2</sub> S <sub>2</sub> O <sub>8</sub> , 80 mM sodium borate buffer (pH 9.0)       | 22.5    | 0.053s <sup>-1</sup> | No data | 20 |
| [{Co <sub>4</sub> (OH) <sub>3</sub> (PO <sub>4</sub> ) <sub>4</sub> (GeW <sub>9</sub> O <sub>34</sub> ) <sub>4</sub> }] <sup>32-</sup>    | A 300 W xenon lamp ( $\lambda > 420$ nm ), 20 $\mu$ M catalyst, 1.0 mM [Ru(bpy) <sub>3</sub> ]Cl <sub>2</sub> , 5.0 mM Na <sub>2</sub> S <sub>2</sub> O <sub>8</sub> , 80 mM sodium borate buffer (pH 9.0)       | 38.75   | 0.105s <sup>-1</sup> | No data | 20 |

|                                                                                 |                                                                                                                                                      |       |                         |         |    |
|---------------------------------------------------------------------------------|------------------------------------------------------------------------------------------------------------------------------------------------------|-------|-------------------------|---------|----|
| $[\{Co_4(OH)_3(PO_4)_4(PW_9O_{34})_4\}^{28-}]^{28-}$                            | A 300 W xenon lamp ( $\lambda > 420$ nm ), 20 $\mu$ M catalyst, 1.0 mM $[Ru(bpy)_3]Cl_2$ , 5.0 mM $Na_2S_2O_8$ , 80 mM sodium borate buffer (pH 9.0) | 20.25 | No data                 | No data | 20 |
| $[\{Co_4(OH)_3(PO_4)_4(AsW_9O_{34})_4\}^{28-}]^{28-}$                           | A 300 W xenon lamp ( $\lambda > 420$ nm ), 20 $\mu$ M catalyst, 1.0 mM $[Ru(bpy)_3]Cl_2$ , 5.0 mM $Na_2S_2O_8$ , 80 mM sodium borate buffer (pH 9.0) | 33.0  | No data                 | No data | 20 |
| $Na_{10}[Co_4(H_2O)_2(VW_9O_{34})_2] \cdot 35H_2O$                              | LED lamp ( $\lambda=455$ nm), 0.2 $\mu$ M catalyst, 1.0 mM $[Ru(bpy)_3] Cl_2$ , 5.0 mM $Na_2S_2O_8$ , 80 mM sodium borate buffer (pH 9.0)            | 4210  | $>1 \times 10^3 s^{-1}$ | 47.7    | 21 |
| $K_{10}[Co-(H_2O)_2(\gamma-SiW_{10}O_{35})_2] \cdot 23H_2O$                     | LED lamp ( $\lambda \geq 420$ nm), 5.0 $\mu$ M catalyst, 1.0 mM $[Ru(bpy)_3] Cl_2$ , 5.0 mM $Na_2S_2O_8$ , 80 mM sodium borate buffer (pH 9.0)       | 186.9 | $1.2 s^{-1}$            | 27      | 22 |
| $Na_{24}[Ni_{12}(OH)_9(CO_3)_3(PO_4)(SiW_9O_{34})_3] \cdot 56H_2O$              | A 300 W xenon lamp ( $\lambda > 420$ nm ), 2 $\mu$ M catalyst, 1.0 mM $[Ru(bpy)_3]Cl_2$ , 5.0 mM $Na_2S_2O_8$ , 80 mM sodium borate buffer (pH 9.0)  | 85.6  | $0.13 s^{-1}$           | No data | 23 |
| $Na_{25}[Ni_{13}(H_2O)_3(OH)_9(PO_4)_4(SiW_9O_{34})_3] \cdot 50H_2O$            | A 300 W xenon lamp ( $\lambda > 420$ nm ), 2 $\mu$ M catalyst, 1.0 mM $[Ru(bpy)_3]Cl_2$ , 5.0 mM $Na_2S_2O_8$ , 80 mM sodium borate buffer (pH 9.0)  | 94.1  | $0.15 s^{-1}$           | No data | 23 |
| $Na_{50}[Ni_{25}(H_2O)_2(OH)_{18}(CO_3)_2(PO_4)_6(SiW_9O_{34})_6] \cdot 85H_2O$ | A 300 W xenon lamp ( $\lambda > 420$ nm ), 2 $\mu$ M catalyst, 1.0 mM $[Ru(bpy)_3]Cl_2$ , 5.0 mM $Na_2S_2O_8$ , 80 mM sodium borate buffer (pH 9.0)  | 124.4 | $0.21 s^{-1}$           | No data | 23 |

$TOF_{initial} = TON_{initial}/60$  s,  $TON_{initial}$  = Molar of oxygen produced in 1 minute/Molar of **1**,  
 $\Phi_{QY}(\text{quantum yield}) = [(\text{initial } O_2 \text{ formation rate})/(\text{photon flux})]$ .

**Table S8.TON and TOF<sub>initial</sub> of Chemical Water Oxidation Catalyzed by Different Catalysts Containing Iron**

| Catalyst                                                                 | Representative reaction conditions                                                                                                                                                                                    | TON          | TOF                 | Ref.      |
|--------------------------------------------------------------------------|-----------------------------------------------------------------------------------------------------------------------------------------------------------------------------------------------------------------------|--------------|---------------------|-----------|
| <b>1</b>                                                                 | LED lamp ( $\lambda \geq 420$ nm), 1.3 $\mu$ M catalyst, 1.0 mM [Ru(bpy) <sub>3</sub> ](ClO <sub>4</sub> ) <sub>2</sub> , 5.0 mM Na <sub>2</sub> S <sub>2</sub> O <sub>8</sub> , 80 mM sodium borate buffer (pH 10.0) | 1815         | 6.3 s <sup>-1</sup> | This work |
| Fe-TAML (X <sub>1</sub> = X <sub>2</sub> =Cl, R= F. Y= H <sub>2</sub> O) | 182 mM (NH <sub>4</sub> ) <sub>2</sub> Ce(NO <sub>3</sub> ) <sub>6</sub> , 0.980 mM catalyst in water                                                                                                                 | 16           | 1.3 s <sup>-1</sup> | 24        |
| [Fe(OTf) <sub>2</sub> (Me <sup>2</sup> Pytacn)]                          | 125 mM (NH <sub>4</sub> ) <sub>2</sub> Ce(NO <sub>3</sub> ) <sub>6</sub> , 37.5 $\mu$ M catalyst in water (pH 1)                                                                                                      | 70 $\pm$ 5   | No data             | 25        |
| [Fe(OTf) <sub>2</sub> (Me <sup>2</sup> Pytacn)]                          | 125 mM (NH <sub>4</sub> ) <sub>2</sub> Ce(NO <sub>3</sub> ) <sub>6</sub> , 12.5 $\mu$ M catalyst in water (pH 1)                                                                                                      | 82 $\pm$ 8   | No data             | 25        |
| [Fe(OTf) <sub>2</sub> (mcp)]                                             | 125 mM (NH <sub>4</sub> ) <sub>2</sub> Ce(NO <sub>3</sub> ) <sub>6</sub> , 37.5 $\mu$ M catalyst in water (pH 1)                                                                                                      | 360 $\pm$ 20 | No data             | 25        |
| [FeCl <sub>2</sub> (mcp)]                                                | 125 mM (NH <sub>4</sub> ) <sub>2</sub> Ce(NO <sub>3</sub> ) <sub>6</sub> , 37.5 $\mu$ M catalyst in water (pH 1)                                                                                                      | 320 $\pm$ 15 | No data             | 25        |
| [(Fe(mcp)) <sub>2</sub> ( $\mu$ -O)( $\mu$ -OH)](OTf) <sub>2</sub>       | 125 mM (NH <sub>4</sub> ) <sub>2</sub> Ce(NO <sub>3</sub> ) <sub>6</sub> , 6.25 $\mu$ M catalyst in water (pH 1)                                                                                                      | 210 $\pm$ 21 | No data             | 25        |
| [Fe(OTf) <sub>2</sub> (mcp)]                                             | 125 mM NaIO <sub>4</sub> , 37.5 $\mu$ M catalyst in water (pH 2)                                                                                                                                                      | > 1050       | No data             | 25        |
| [Fe(OTf) <sub>2</sub> (bpbp)]                                            | 125 mM (NH <sub>4</sub> ) <sub>2</sub> Ce(NO <sub>3</sub> ) <sub>6</sub> , 37.5 $\mu$ M catalyst in water (pH 1)                                                                                                      | 63 $\pm$ 7   | No data             | 25        |
| [Fe(OTf) <sub>2</sub> (mep)]                                             | 125 mM (NH <sub>4</sub> ) <sub>2</sub> Ce(NO <sub>3</sub> ) <sub>6</sub> , 37.5 $\mu$ M catalyst in water (pH 1)                                                                                                      | 145 $\pm$ 5  | No data             | 25        |
| [Fe(OTf) <sub>2</sub> (tpa)]                                             | 125 mM (NH <sub>4</sub> ) <sub>2</sub> Ce(NO <sub>3</sub> ) <sub>6</sub> , 37.5 $\mu$ M catalyst in water (pH 1)                                                                                                      | 40 $\pm$ 4   | No data             | 25        |
| Fe(BQEN)(OTf) <sub>2</sub>                                               | 125 mM (NH <sub>4</sub> ) <sub>2</sub> Ce(NO <sub>3</sub> ) <sub>6</sub> , 12.5 $\mu$ M catalyst in nonbuffered aqueous solution                                                                                      | 80 $\pm$ 10  | No data             | 16        |
| Fe(BQCN)(OTf) <sub>2</sub>                                               | 125 mM (NH <sub>4</sub> ) <sub>2</sub> Ce(NO <sub>3</sub> ) <sub>6</sub> , 12.5 $\mu$ M catalyst in nonbuffered aqueous solution                                                                                      | 20 $\pm$ 5   | No data             | 16        |

TOF<sub>initial</sub> = TON<sub>initial</sub>/60 s, TON<sub>initial</sub> = Molar of oxygen produced in 1 minute/Molar of **1**.

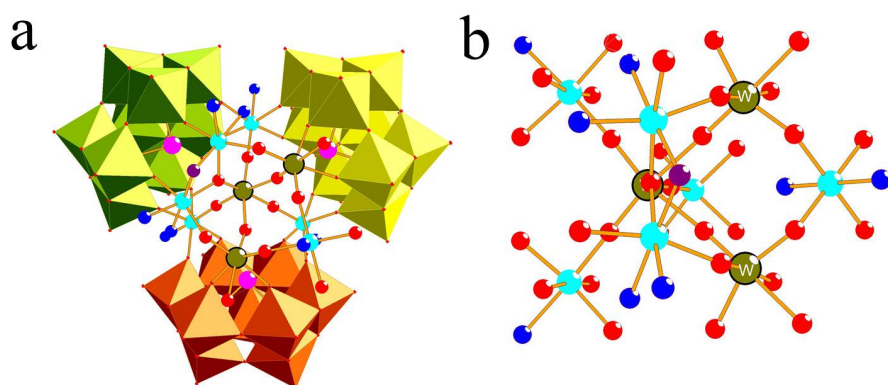

**Figure S1.** X-ray crystal structure of half-unit of **1a** in combined polyhedral and ball-and-stick representations. Color scheme:  $[\alpha\text{-SbW}_9\text{O}_{33}]^{9-}$  polyhedra (lime, yellow, orange), Fe (cyan), O (red),  $\text{H}_2\text{O}$  (blue), OH (violet), Sb (pink), W (green).

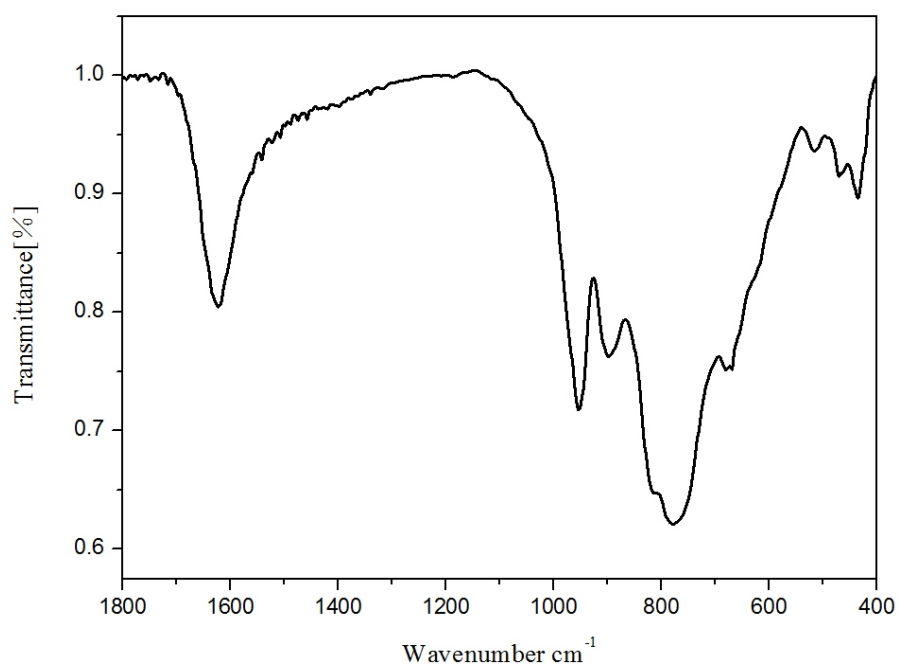

**Figure S2.** FT-IR spectrum of  $\text{Na}_6[\text{Fe}_4(\text{H}_2\text{O})_{10}(\text{SbW}_9\text{O}_{33})_2] \cdot 40\text{H}_2\text{O}$ .

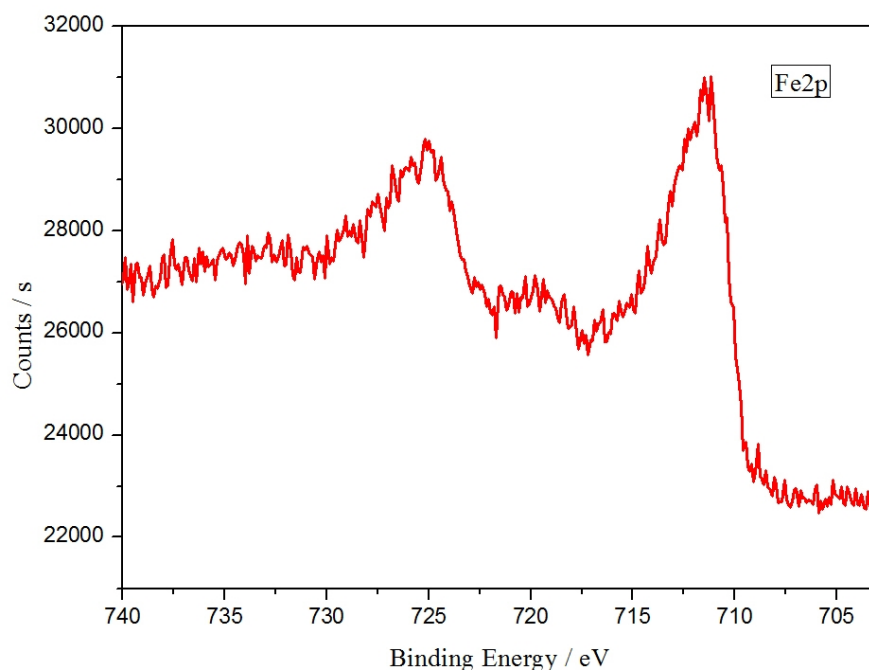

**Figure S3.** X-ray photoelectron spectra of **1** showing the region of Fe 2p<sub>3/2</sub> and Fe 2p<sub>1/2</sub> peaks of **1**. The binding energy of each element was normalized to the C 1s peak (284.8 eV).

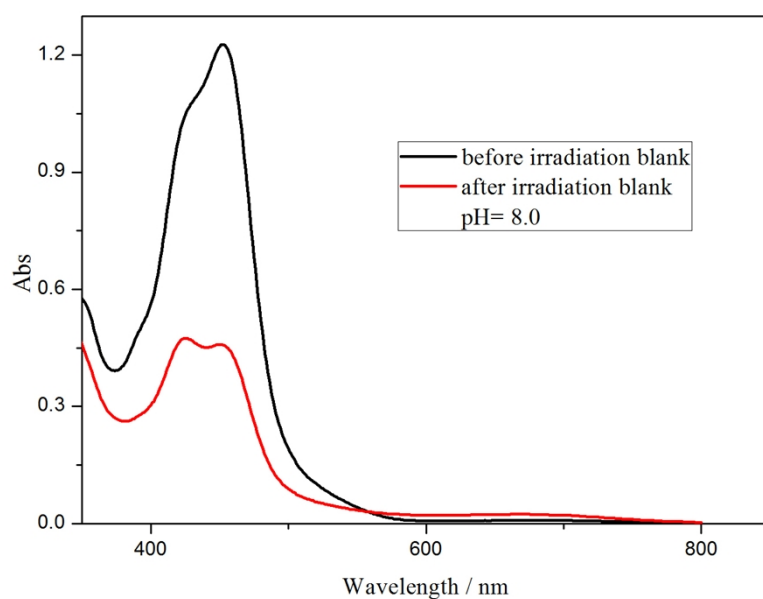

**Figure S4.** UV-vis spectral changes during the photocatalytic O<sub>2</sub> evolution without any catalyst. The black line shows the absorption of aqueous borate buffer solutions (pH = 8.0, 80 mM) containing [Ru(bpy)<sub>3</sub>](ClO<sub>4</sub>)<sub>2</sub> (1.0 mM) and Na<sub>2</sub>S<sub>2</sub>O<sub>8</sub> (5.0 mM). The red line shows the absorption of above solution after 9 min of irradiation. (the concentration of [Ru(bpy)<sub>3</sub>]<sup>2+</sup> decreased by 62.7%)

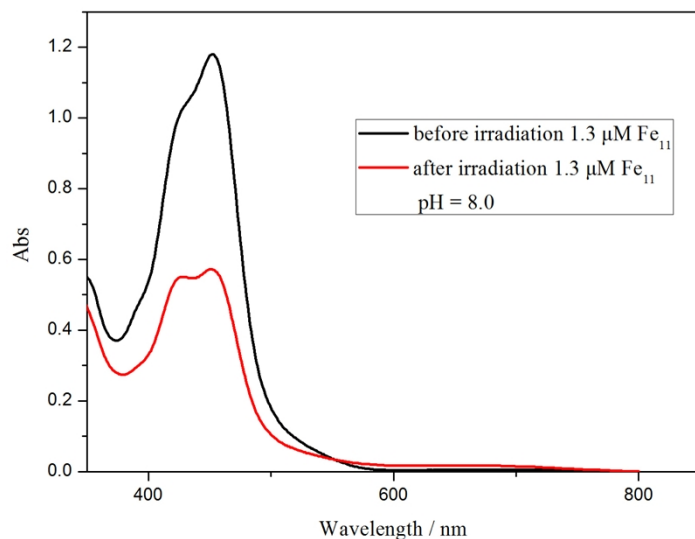

**Figure S5.** UV-vis spectral changes during the photocatalytic  $\text{O}_2$  evolution with  $\text{Fe}_{11}$  POM. The black line shows the absorption of aqueous borate buffer solutions (pH = 8.0, 80 mM) containing  $[\text{Ru}(\text{bpy})_3](\text{ClO}_4)_2$  (1.0 mM),  $\text{Na}_2\text{S}_2\text{O}_8$  (5.0 mM) and  $\text{Fe}_{11}$  POM (1.3  $\mu\text{M}$ ). The red line shows the absorption of above solution after 9 min of irradiation. (the concentration of  $[\text{Ru}(\text{bpy})_3]^{2+}$  decreased by 51.5%)

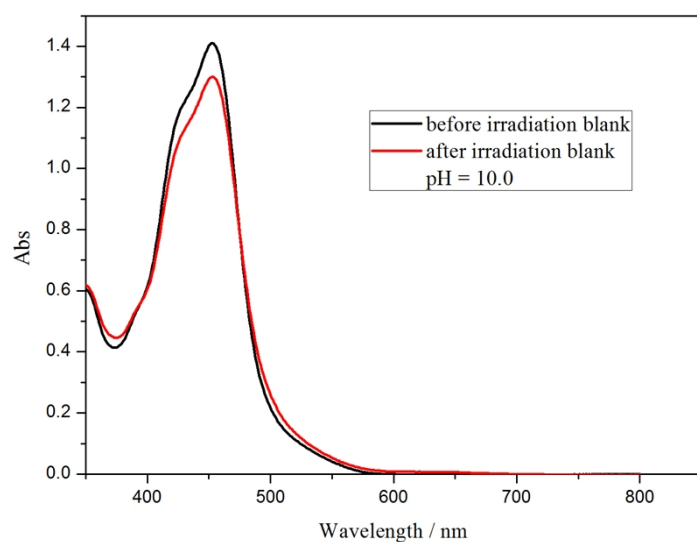

**Figure S6.** UV-vis spectral changes during the photocatalytic  $\text{O}_2$  evolution without any catalyst. The black line shows the absorption of aqueous borate buffer solutions (pH = 10.0, 80 mM) containing  $[\text{Ru}(\text{bpy})_3](\text{ClO}_4)_2$  (1.0 mM) and  $\text{Na}_2\text{S}_2\text{O}_8$  (5.0 mM). The red line shows the absorption of above solution after 9 min of irradiation. (the concentration of  $[\text{Ru}(\text{bpy})_3]^{2+}$  decreased by 7.8%)



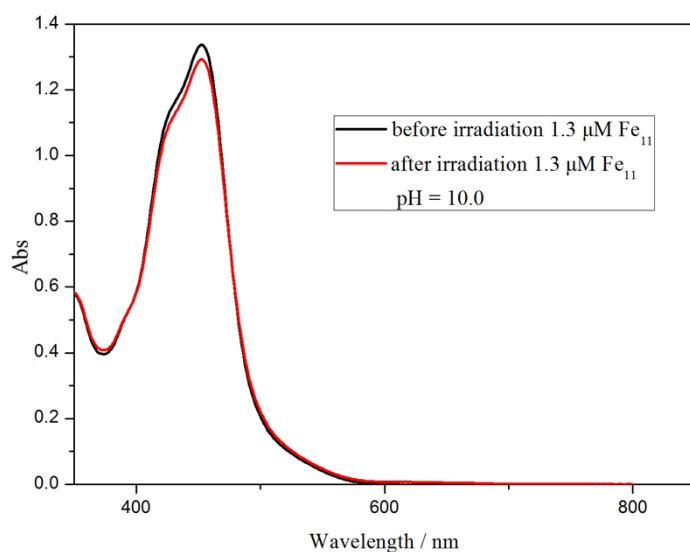

**Figure S7.** UV-vis spectral changes during the photocatalytic  $\text{O}_2$  evolution with  $\text{Fe}_{11}$  POM. The black line shows the absorption of aqueous borate buffer solutions (pH = 10.0, 80 mM) containing  $[\text{Ru}(\text{bpy})_3](\text{ClO}_4)_2$  (1.0 mM),  $\text{Na}_2\text{S}_2\text{O}_8$  (5.0 mM) and  $\text{Fe}_{11}$  POM (1.3  $\mu\text{M}$ ). The red line shows the absorption of above solution after 9 min of irradiation. (the concentration of  $[\text{Ru}(\text{bpy})_3]^{2+}$  decreased by 3.4%)

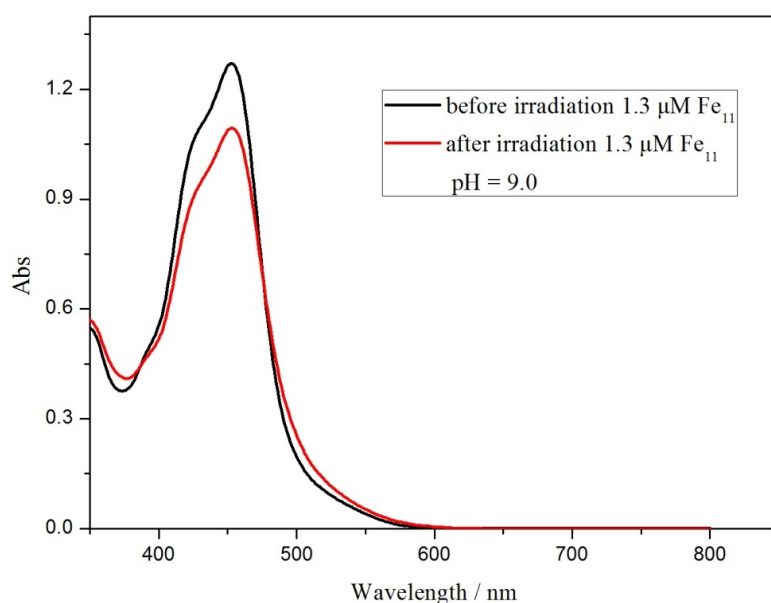

**Figure S8.** UV-vis spectral changes during the photocatalytic  $\text{O}_2$  evolution with  $\text{Fe}_{11}$  POM. The black line shows the absorption of aqueous borate buffer solutions (pH = 9.0, 80 mM) containing  $[\text{Ru}(\text{bpy})_3](\text{ClO}_4)_2$  (1.0 mM),  $\text{Na}_2\text{S}_2\text{O}_8$  (5.0 mM) and  $\text{Fe}_{11}$  POM (1.3  $\mu\text{M}$ ). The red line shows the absorption of above solution after 9 min of irradiation. (the concentration of  $[\text{Ru}(\text{bpy})_3]^{2+}$  decreased by 13.9%)

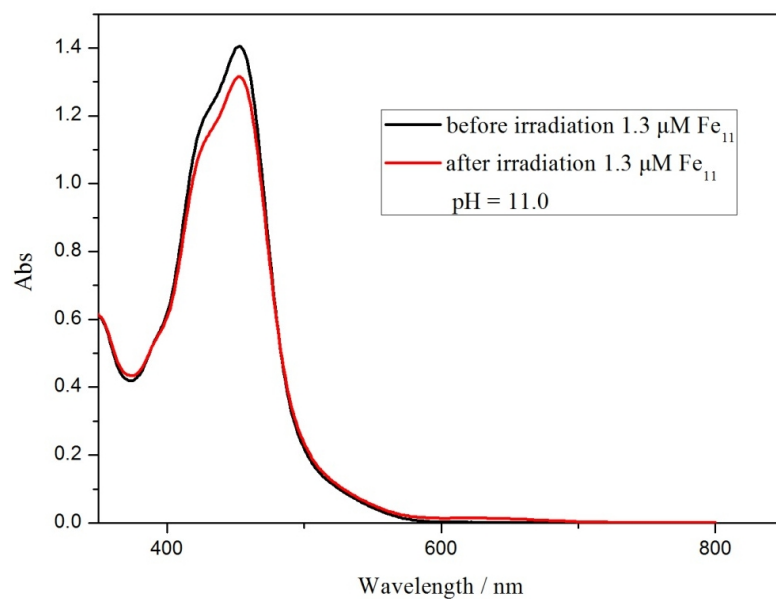

**Figure S9.** UV-vis spectral changes during the photocatalytic  $O_2$  evolution with  $Fe_{11}$  POM. The black line shows the absorption of aqueous borate buffer solutions (pH = 11.0, 80 mM) containing  $[Ru(bpy)_3](ClO_4)_2$  (1.0 mM),  $Na_2S_2O_8$  (5.0 mM) and  $Fe_{11}$  POM (1.3  $\mu M$ ). The red line shows the absorption of above solution after 9 min of irradiation. (the concentration of  $[Ru(bpy)_3]^{2+}$  decreased by 6.3%)

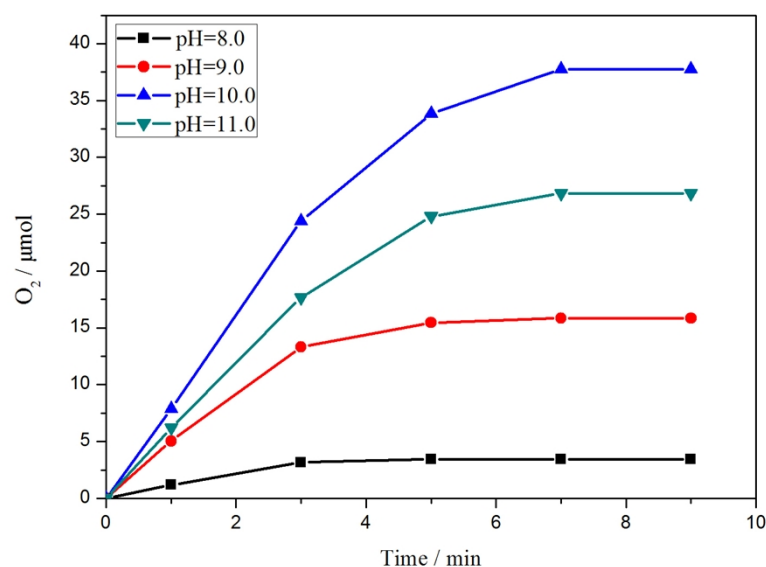

**Figure S10.** Kinetics of  $O_2$  formation in the photocatalytic system under various pH conditions (pH = 8.0, 80 mM NaBi, black; pH = 9.0, 80 mM NaBi, red; pH = 10.0, 80 mM NaBi, blue; pH = 11.0, 80 mM NaBi, green). Conditions: LED lamp ( $\lambda \geq 420$  nm), 1.3  $\mu M$  **1**, 1.0 mM  $[Ru(bpy)_3](ClO_4)_2$ , 5.0 mM  $Na_2S_2O_8$ , total reaction volume is 16mL and overall volume is ~21mL, vigorous agitation using a magnetic stirrer.

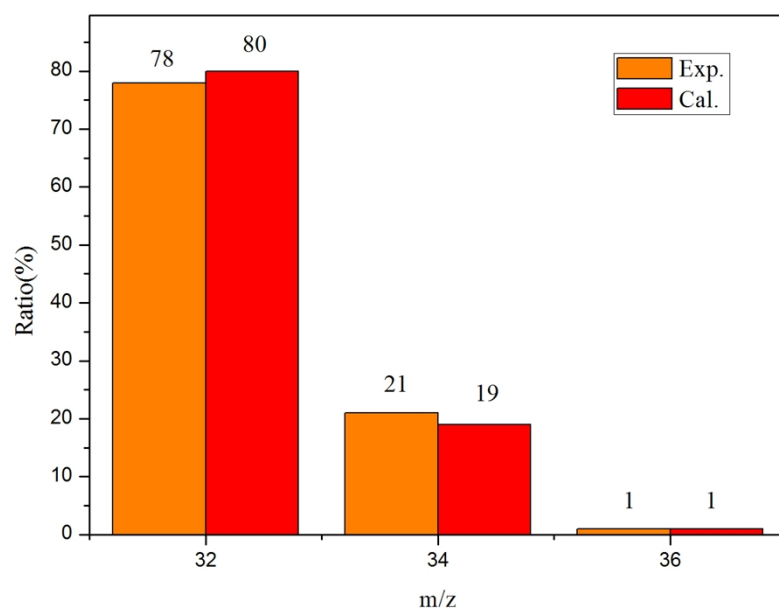

**Figure S11.** Observed and theoretical relative abundances of  $^{18}\text{O}$ -labeled and unlabeled oxygen evolved during the photocatalytic oxidation of a buffer solution (4.5 mL) prepared with  $\text{H}_2^{18}\text{O}$ -enriched water (10.8%  $\text{H}_2^{18}\text{O}$ ) containing **1** (1.3  $\mu\text{M}$ ),  $[\text{Ru}(\text{bpy})_3]^{2+}$  (1.0 mM) and  $\text{Na}_2\text{S}_2\text{O}_8$  (5.0 mM) (yellow, observed mass intensity; red, calculated values assuming that evolved  $\text{O}_2$  results exclusively from water).

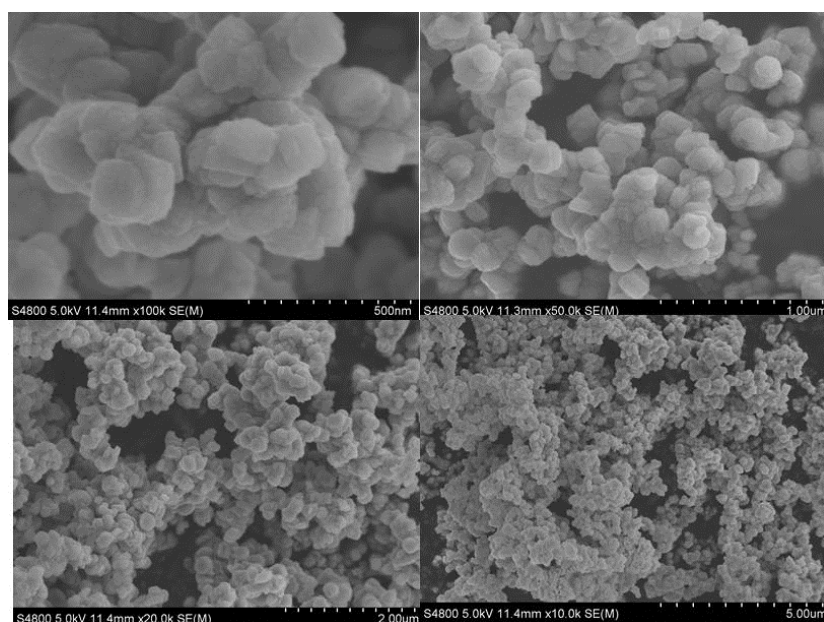

**Figure S12.** SEM images of commercially available  $\text{Fe}_2\text{O}_3$  particles.

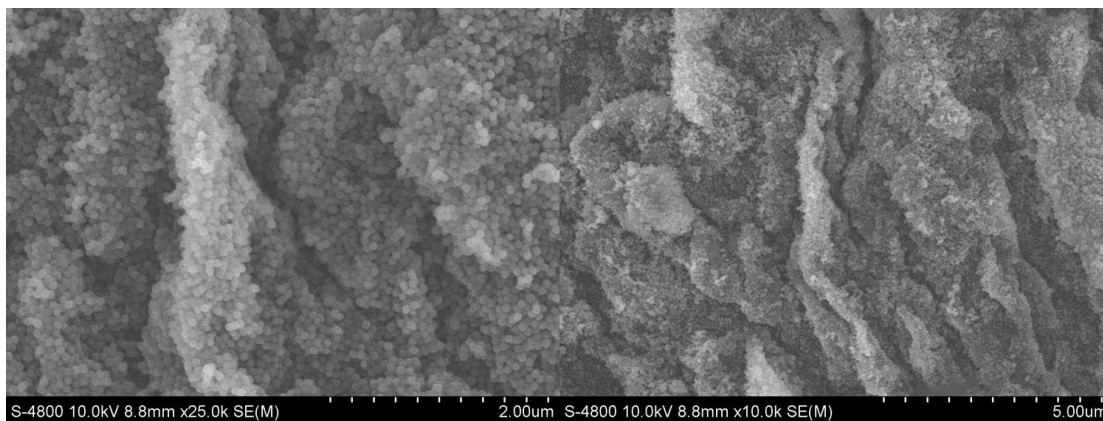

**Figure S13.** SEM images of  $\alpha$ -Fe<sub>2</sub>O<sub>3</sub> nanoparticles.

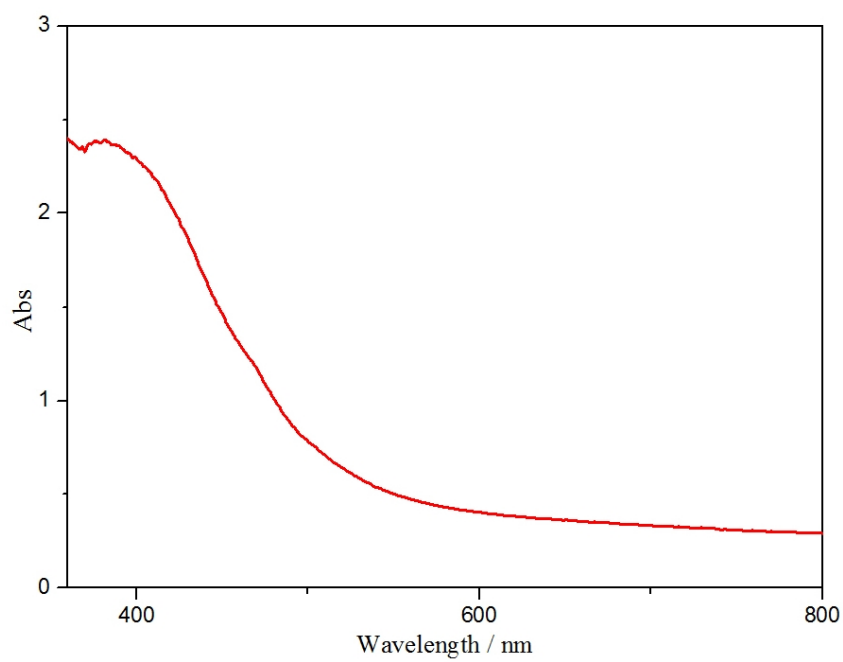

**Figure S14.** UV-Vis diffuse reflectance spectrum of **1**.

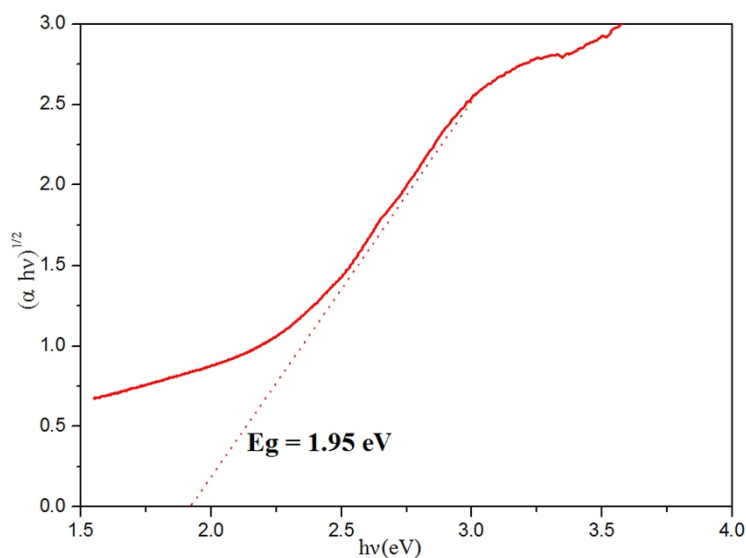

**Figure S15.**  $(\alpha h\nu)^{1/2}$  versus  $h\nu$  curve of **1**. The red dashed lines are the tangents of the curves. The intersection value is the band gap.

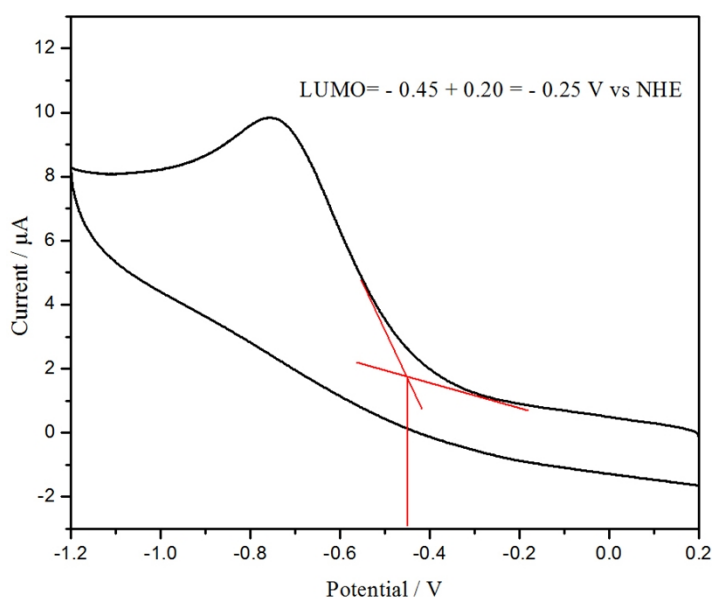

**Figure S16.** Cyclic voltammogram of  $2.5 \times 10^{-4}$  M **1** in pure water (pH = 7.0) at a scan rate of 100 mV/s. The working electrode was glassy carbon and the reference electrode was Ag/AgCl.

With Ag/AgCl electrode as reference electrode, relative to that NHE potential of 0.20 eV, the formula for calculating level:

$$E_{\text{HOMO}} = -(eE^{\text{ox}} + 4.5 + 0.20) \text{ eV} = -(eE^{\text{ox}} + 4.70) \text{ eV}$$

$$E_{\text{LUMO}} = -(eE^{\text{red}} + 4.5 + 0.20) \text{ eV} = -(eE^{\text{red}} + 4.70) \text{ eV}$$

$$E_{\text{g}} = E_{\text{HOMO}} - E_{\text{LUMO}} \quad E^{\text{red}} = -0.25 \text{ V}$$

$$E_{\text{LUMO}} = -(E^{\text{red}} + 4.5 + 0.20) \text{ eV} = -(-0.25 + 4.70) \text{ eV} = -4.45 \text{ eV} \quad E_{\text{g}} = 1.95 \text{ eV}$$

$$E_{\text{HOMO}} = -(1.95 + 4.45) \text{ eV} = -6.40 \text{ eV}$$

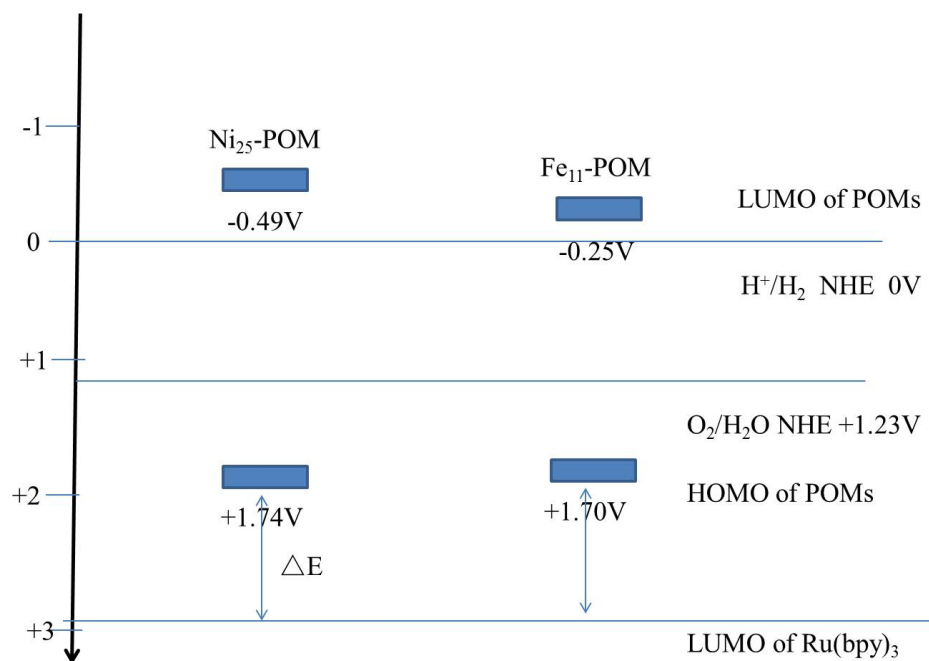

**Figure S17.** The band gap structures of  $\text{Ni}_{25}\text{-POM}$  and compounds **1**.  $\Delta E = \text{HOMO}([\text{Ru}(\text{bpy})_3]^{3+}) - \text{HOMO}(\text{POMs})$ .

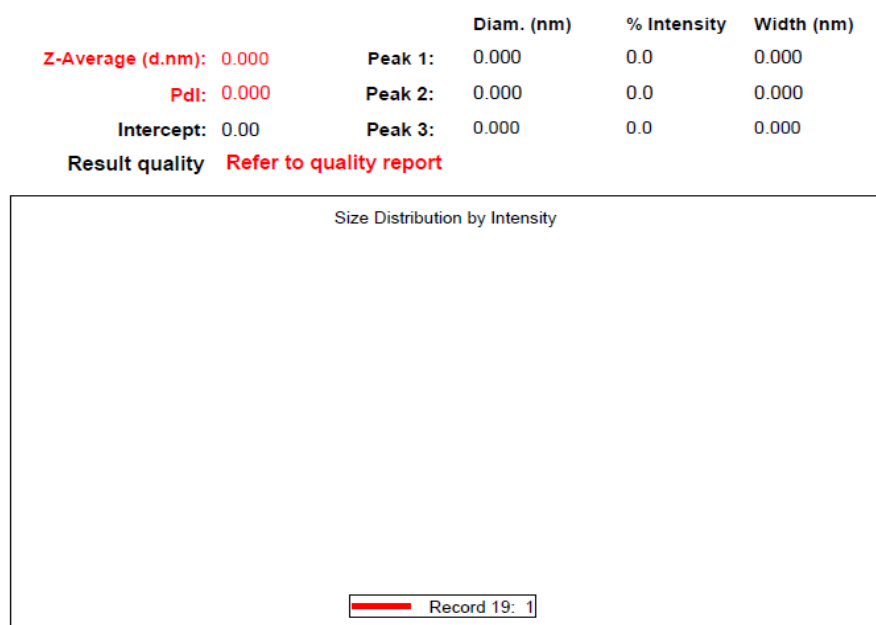

**Figure S18.** Particle size distribution measured by DLS in a solution of **1** (1.30  $\mu\text{M}$ ),  $[\text{Ru}(\text{bpy})_3](\text{ClO}_4)_2$  (1.0 mM),  $\text{Na}_2\text{S}_2\text{O}_8$  (5.0 mM) in 80 mM, pH = 10.0 borate buffer after 9 min of irradiation

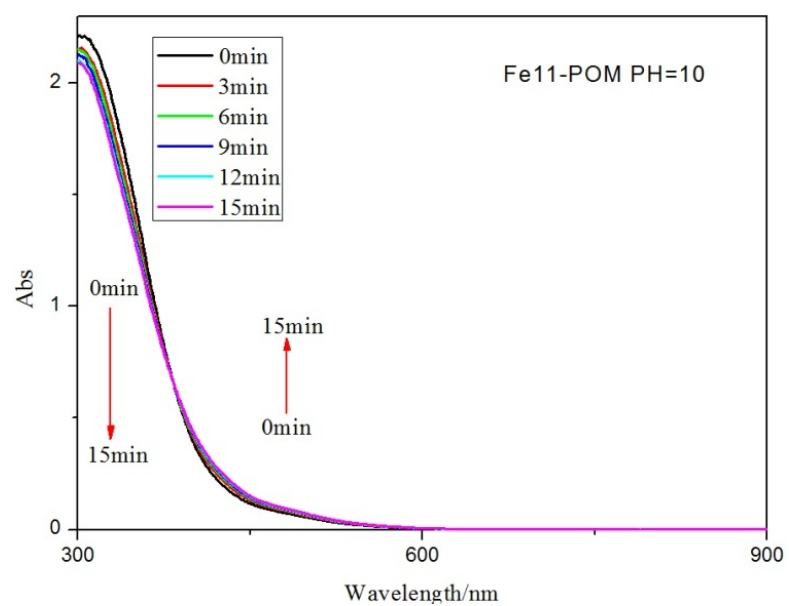

**Figure S19.** Time-dependent UV-vis absorption spectra of **1** (50  $\mu\text{M}$ ) over 15 min in borate buffer (80 mM, pH 10.0)

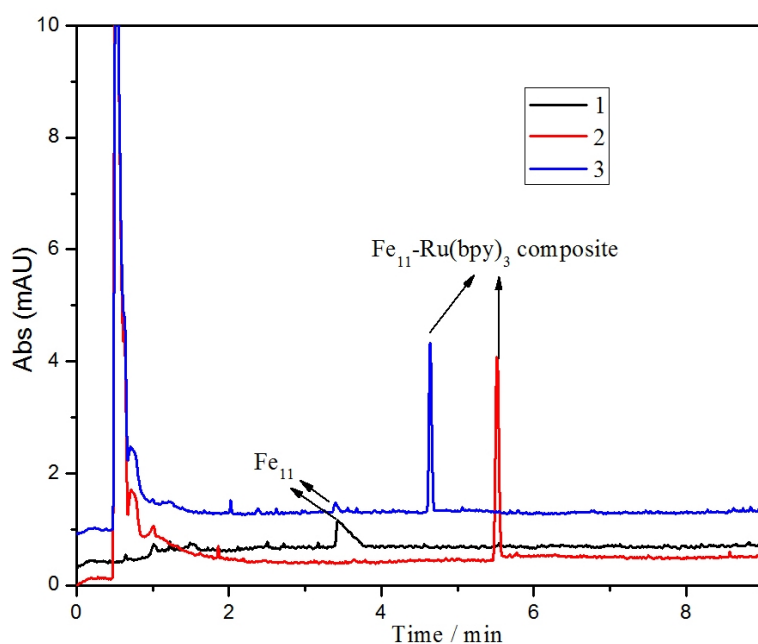

**Figure S20.** An electropherogram for 5.0  $\mu\text{M}$  of compounds **1**. Black lines: 5  $\mu\text{M}$  of compounds **1** in a 20 mM sodium borate buffer solution (pH = 10.0). Red lines: 5.0  $\mu\text{M}$  of compounds **1** in a 20 mM sodium borate buffer solution (pH = 9.0) containing  $[\text{Ru}(\text{bpy})_3]^{2+}$  (1 mM),  $\text{Na}_2\text{S}_2\text{O}_8$  (5 mM) before illumination. Blue lines: 5.0  $\mu\text{M}$  of compounds **1** in a 20 mM sodium borate buffer solution (pH = 10.0) containing  $[\text{Ru}(\text{bpy})_3]^{2+}$  (1 mM),  $\text{Na}_2\text{S}_2\text{O}_8$  (5 mM) after 9 min of irradiation. Experimental conditions for capillary electrophoresis: Fused-silica capillaries (50 $\mu\text{m}$  i.d., 365 $\mu\text{m}$  o.d., Hebei Yongnian Factory, China) with total length of 50.2 cm and effective length of 10 cm were used. The detection wavelength was set at 214 nm. The running buffer for CE separation was 20 mM sodium borate buffer (pH 10.0). The separation voltage was set at -20 kV. The sample was injected into the capillary (0.5psi, 3 s).

The peaks of compounds **1** was not observed before photocatalytic reactions, because formation of POM-Ru(bpy)<sub>3</sub> composite precipitates is more than that after photocatalytic reactions .



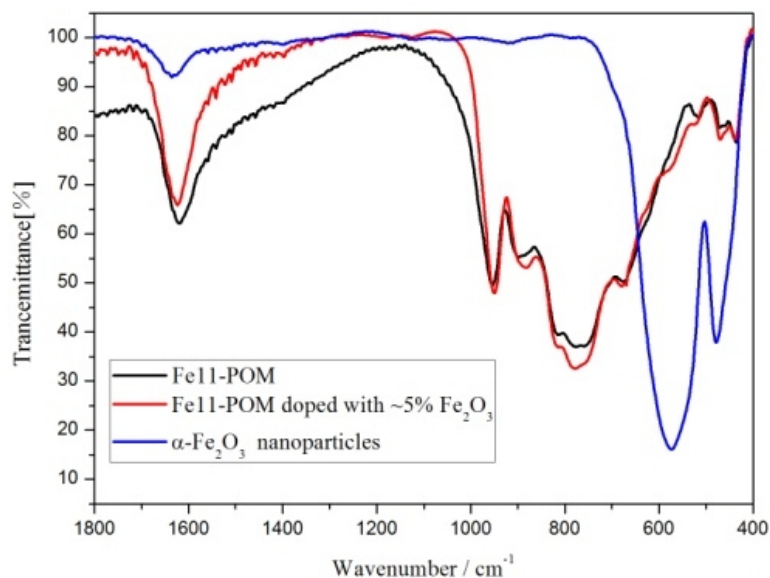

**Figure S21.** FT-IR spectra of **1** and  $\alpha$ -Fe<sub>2</sub>O<sub>3</sub> nanoparticles. Black: spectrum of **1**. Red: **1** doped with ~5%  $\alpha$ -Fe<sub>2</sub>O<sub>3</sub> nanoparticles. Blue:  $\alpha$ -Fe<sub>2</sub>O<sub>3</sub> nanoparticles, highlighting the characteristic peaks at 480 cm<sup>-1</sup> and 580 cm<sup>-1</sup> that would be visible if **1** decomposes to  $\alpha$ -Fe<sub>2</sub>O<sub>3</sub> nanoparticles under catalytic conditions.

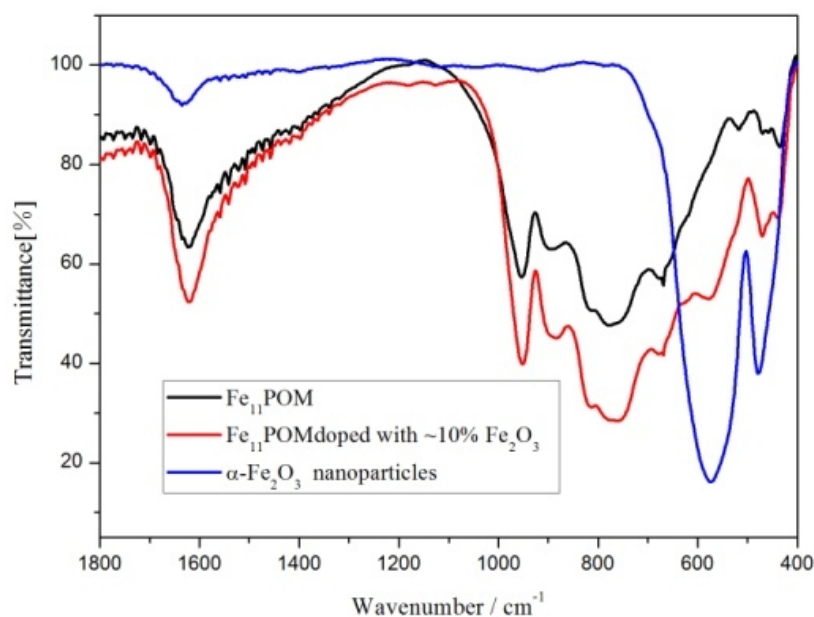

**Figure S22.** FT-IR spectra of **1** and  $\alpha$ -Fe<sub>2</sub>O<sub>3</sub> nanoparticles. Black: spectrum of **1**. Red: **1** doped with ~10%  $\alpha$ -Fe<sub>2</sub>O<sub>3</sub> nanoparticles. Blue:  $\alpha$ -Fe<sub>2</sub>O<sub>3</sub> nanoparticles, highlighting the characteristic peaks at 480 cm<sup>-1</sup> and 580 cm<sup>-1</sup> that would be visible if **1** decomposes to  $\alpha$ -Fe<sub>2</sub>O<sub>3</sub> nanoparticles under catalytic conditions.

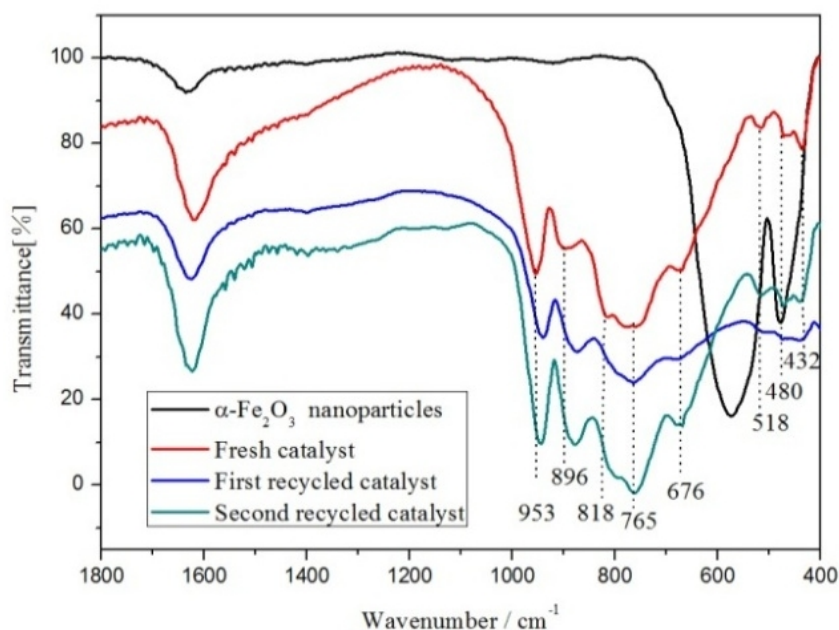

**Figure S23.** FT-IR spectra of **1**, recovered catalyst and  $\alpha$ -Fe<sub>2</sub>O<sub>3</sub> nanoparticles: fresh catalyst, red; first recycled catalyst, blue; second recycled catalyst, green;  $\alpha$ -Fe<sub>2</sub>O<sub>3</sub> nanoparticles, black.

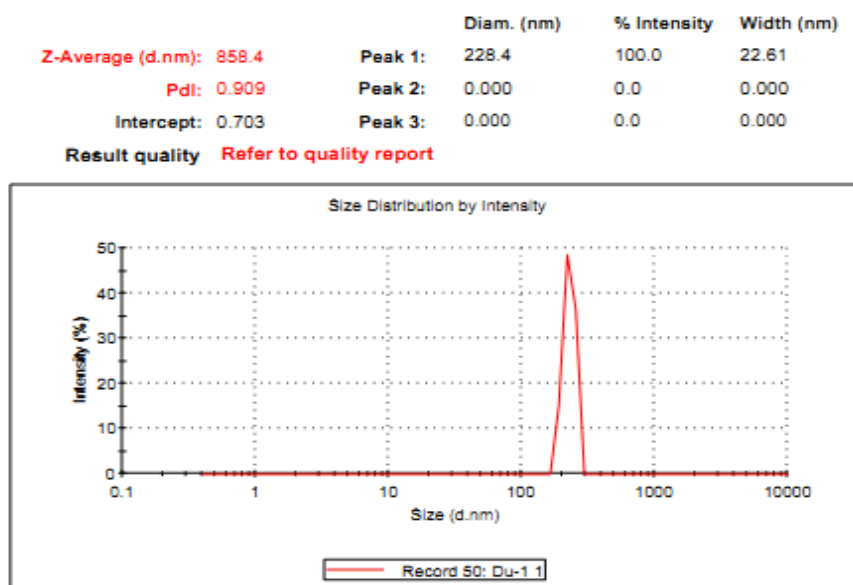

**Figure S24.** Particle size distribution measured by DLS in a solution of 99.0% of **1** and 1.0% Fe(NO<sub>3</sub>)<sub>3</sub> (**1** + Fe(NO<sub>3</sub>)<sub>2</sub> = 1.3  $\mu$ M), [Ru(bpy)<sub>3</sub>](ClO<sub>4</sub>)<sub>2</sub> (1.0 mM), Na<sub>2</sub>S<sub>2</sub>O<sub>8</sub> (5.0 mM) in 80 mM borate buffer (pH = 10.0) after 9 min of irradiation.

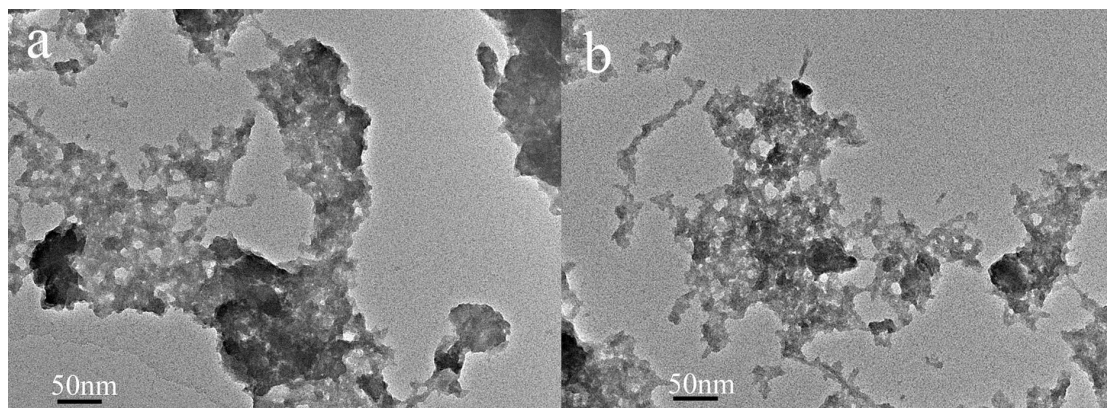

**Figure S25.** TEM images of the fresh catalyst (a) and recovered catalyst (b).

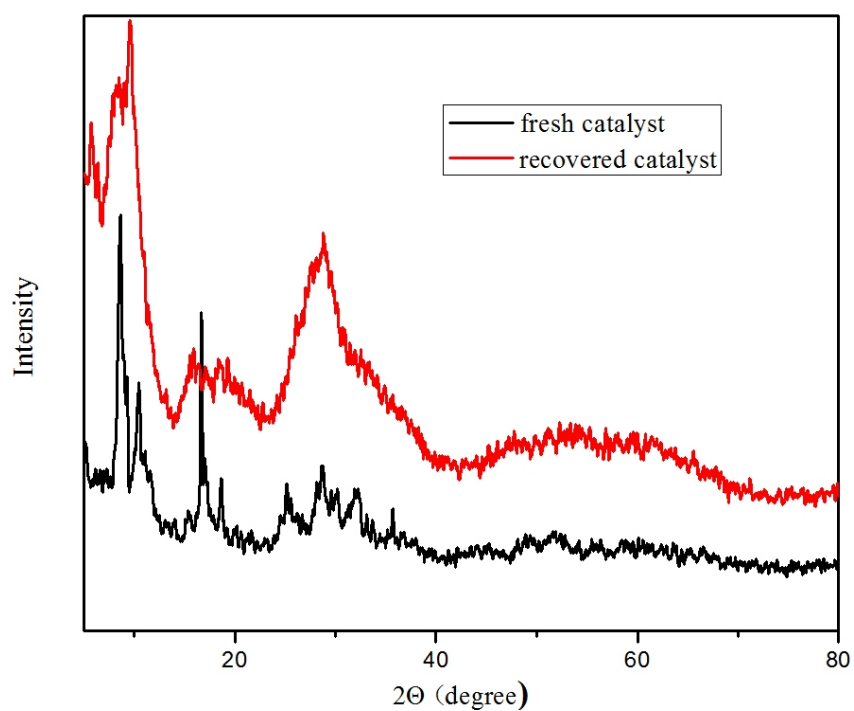

**Figure S26.** XRD of fresh catalyst (black) and recovered catalyst (red).

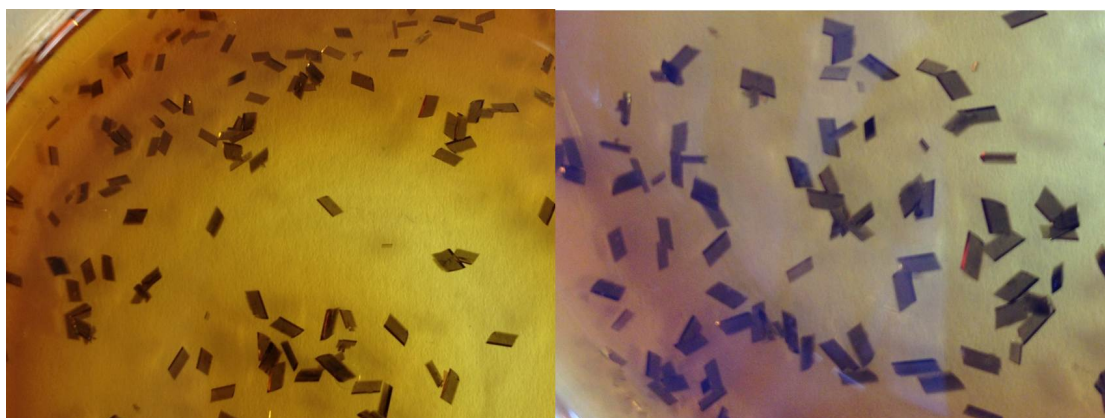

**Figure S27.** Images for crystal of **1**.

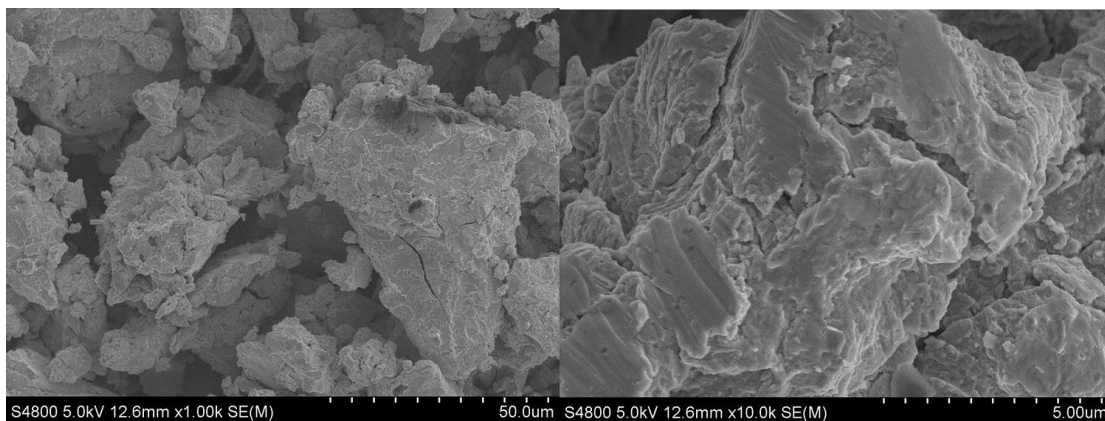

**Figure S28.** SEM images of **1**

## References

1. X. Du, J. Zhao , J. Mi , Y. Ding , P. Zhou, B. Ma, J. Zhao and J. Song, *Nano Energy*, 2015, **DOI:10.1016/j.nanoen.2015.06.025**.
2. T. Raming, A. Winnubst, C. M. van Kats and A. Philipse, *J. Colloid Interface Sci.*, 2002, **249**, 346-350.
3. U. Kortz, M. G. Savelieff, B. S. Bassil, B. Keita and L. Nadjo, *Inorg. Chem.*, 2002, **41**, 783-789.
4. F. Zonnevijlle, C. M. Tourne and G. F. Tourne, *Inorg. Chem.*, 1982, **21**, 2751-2757.

5. Z. Huang, Z. Luo, Y. V. Geletii, J. W. Vickers, Q. Yin, D. Wu, Y. Hou, Y. Ding, J. Song, D. G. Musaev, C. L. Hill and T. Lian, *J. Am. Chem. Soc.*, 2011, **133**, 2068-2071.
6. G. Zhu, Y. V. Geletii, P. Kogerler, H. Schilder, J. Song, S. Lense, C. Zhao, K. I. Hardcastle, D. G. Musaev and C. L. Hill, *Dalton Trans.*, 2012, **41**, 2084-2090.
7. S. Tanaka, M. Annaka and K. Sakai, *Chem. Commun.*, 2012, **48**, 1653-1655.
8. C. Leung, S. Ng, C. Ko, W. Man, J. Wu, L. Chen and T. Lau, *Energy Environ. Sci.*, 2012, **5**, 7903-7907.
9. D. Hong, J. Jung, J. Park, Y. Yamada, T. Suenobu, Y.-M. Lee, W. Nam and S. Fukuzumi, *Energy Environ. Sci.*, 2012, **5**, 7606-7616.
10. N. S. McCool, D. M. Robinson, J. E. Sheats and G. C. Dismukes, *J. Am. Chem. Soc.*, 2011, **133**, 11446-11449.
11. G. Zhu, E. N. Glass, C. Zhao, H. Lv, J. W. Vickers, I. Geletii, D. G. Musaev, J. Song and C. L. Hill, *Dalton Trans.*, 2012, **41**, 13043-13049.
12. C. Besson, Z. Huang, Y. V. Geletii, S. Lense, K. I. Hardcastle, D. G. Musaev, T. Lian, A. Proust and C. L. Hill, *Chem. Commun.*, 2010, **46**, 2784-2786.
13. P. Car, M. Guttentag, K. K. Baldridge, R. Alberto and G. R. Patzke, *Green Chem.*, 2012, **14**, 1680-1688.
14. L. Tong, Y. Wang, L. Duan, Y. Xu, X. Cheng, A. Fischer, M. r. S. Ahlquist and L. Sun, *Inorg. Chem.*, 2012, **51**, 3388-3398.
15. G. Chen, L. Chen, S. Ng, W. Man and T. Lau, *Angew.Chem., Int. Ed.*, 2013, **52**, 1789-1791.
16. D. Hong, S. Mandal, Y. Yamada, Y. M. Lee, W. Nam, A. Llobet and S. Fukuzumi, *Inorg. Chem.*, 2013, **52**, 9522-9531.
17. F. Evangelisti, R. Guttinger, R. More, S. Lubner and G. R. Patzke, *J. Am. Chem. Soc.*, 2013, **135**, 18734-18737.
18. F. Evangelisti, P. Car, O. Blacque and G. R. Patzke, *Catal. Sci. Technol.*, 2013, **3**, 3117.
19. G. Chen, L. Chen, S. M. Ng and T. C. Lau, *ChemSusChem*, 2014, **7**, 127-134.
20. X. B. Han, Z. M. Zhang, T. Zhang, Y. G. Li, W. Lin, W. You, Z. M. Su and E. B. Wang, *J. Am. Chem. Soc.*, 2014, **136**, 5359-5366.
21. H. Lv, J. Song, Y. V. Geletii, J. W. Vickers, J. M. Sumliner, D. G. Musaev, P. Kogerler, P. F. Zhuk, J. Bacsá, G. Zhu and C. L. Hill, *J. Am. Chem. Soc.*, 2014, **136**, 9268-9271.
22. R. Xiang, Y. Ding and J. Zhao, *Chem. Asian. J.*, 2014, **9**, 3228-3237.
23. X. B. Han, Y. G. Li, Z. M. Zhang, H. Q. Tan, Y. Lu and E. B. Wang, *J. Am. Chem. Soc.*, 2015, **137**, 5486-5493.
24. W. C. Ellis, N. D. McDaniel, S. Bernhard and T. J. Collins, *J. Am. Chem. Soc.*, 2010, **132**, 10990-10991.
25. J. L. Fillol, Z. Codolà, I. Garcia-Bosch, L. Gómez, J. J. Pla and M. Costas, *Nat. Chem.*, 2011, **3**, 807-813.
